# Supplementary material
Source: publisher figshare collection journal article supplement (https://frontiersin.figshare.com/ndownloader/files/21820560)

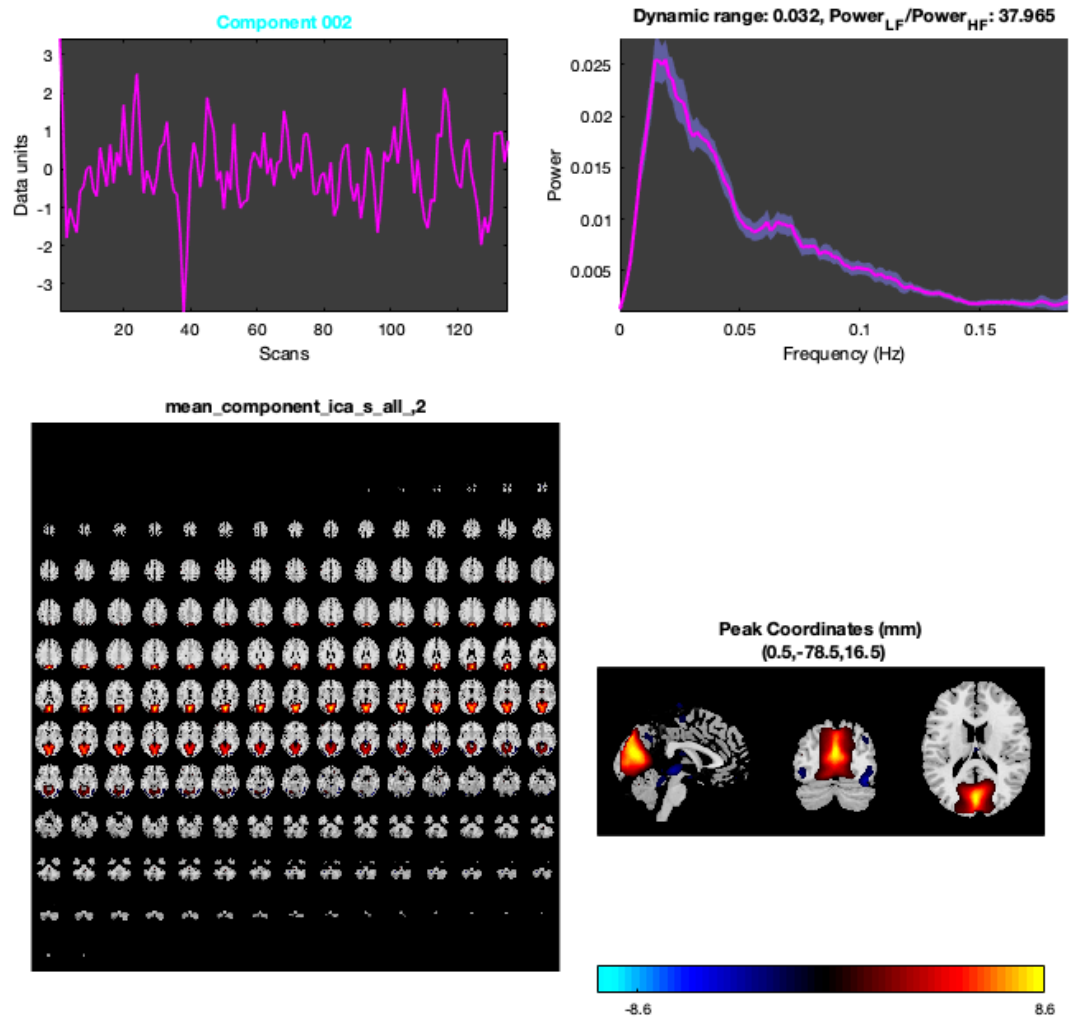

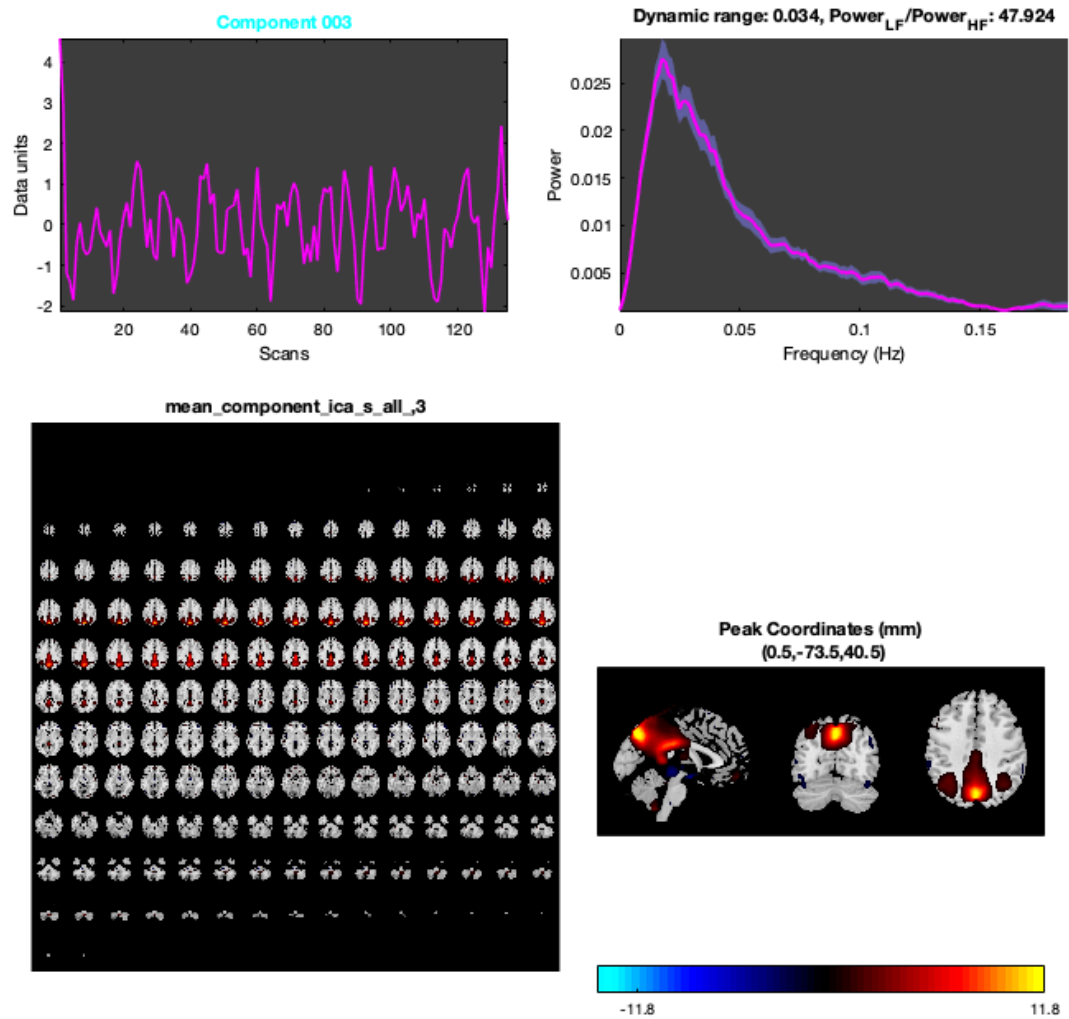

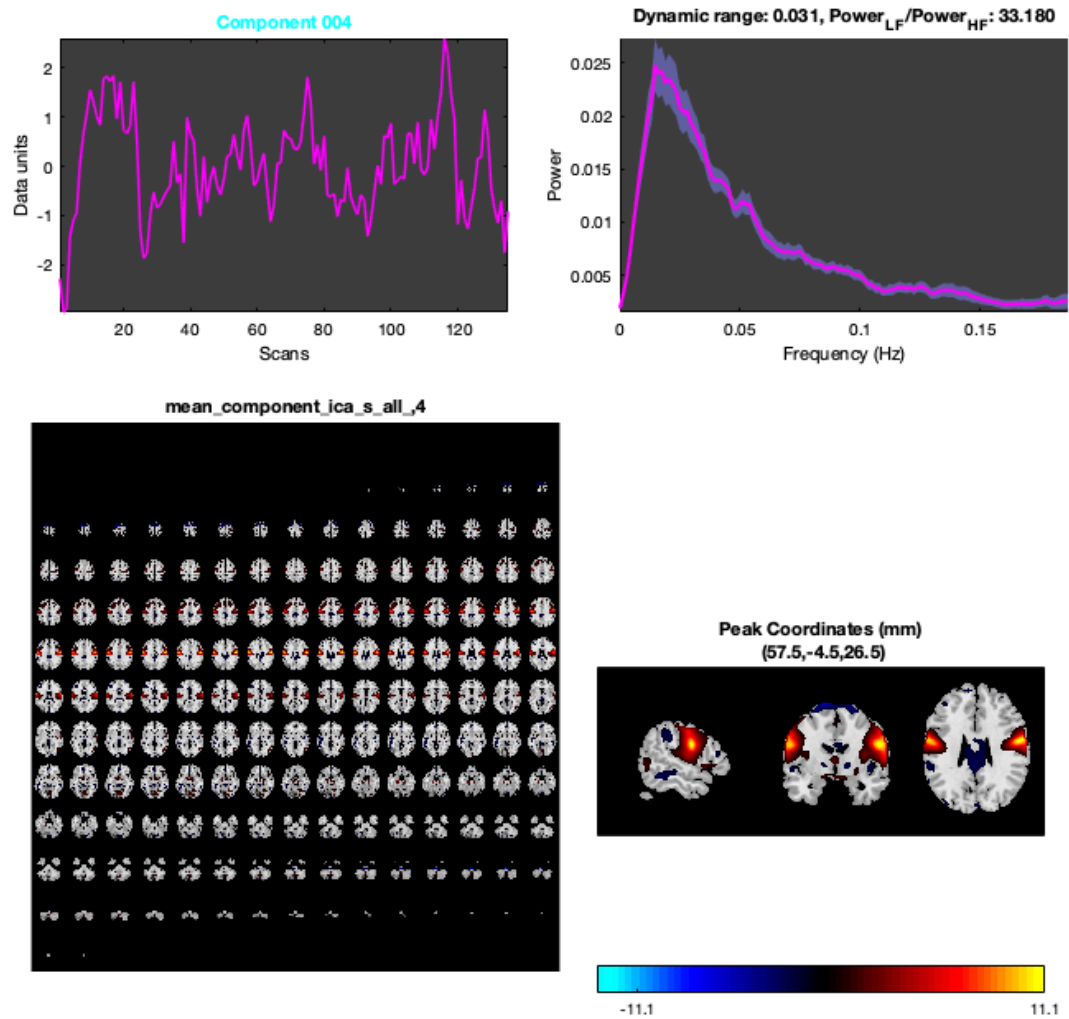

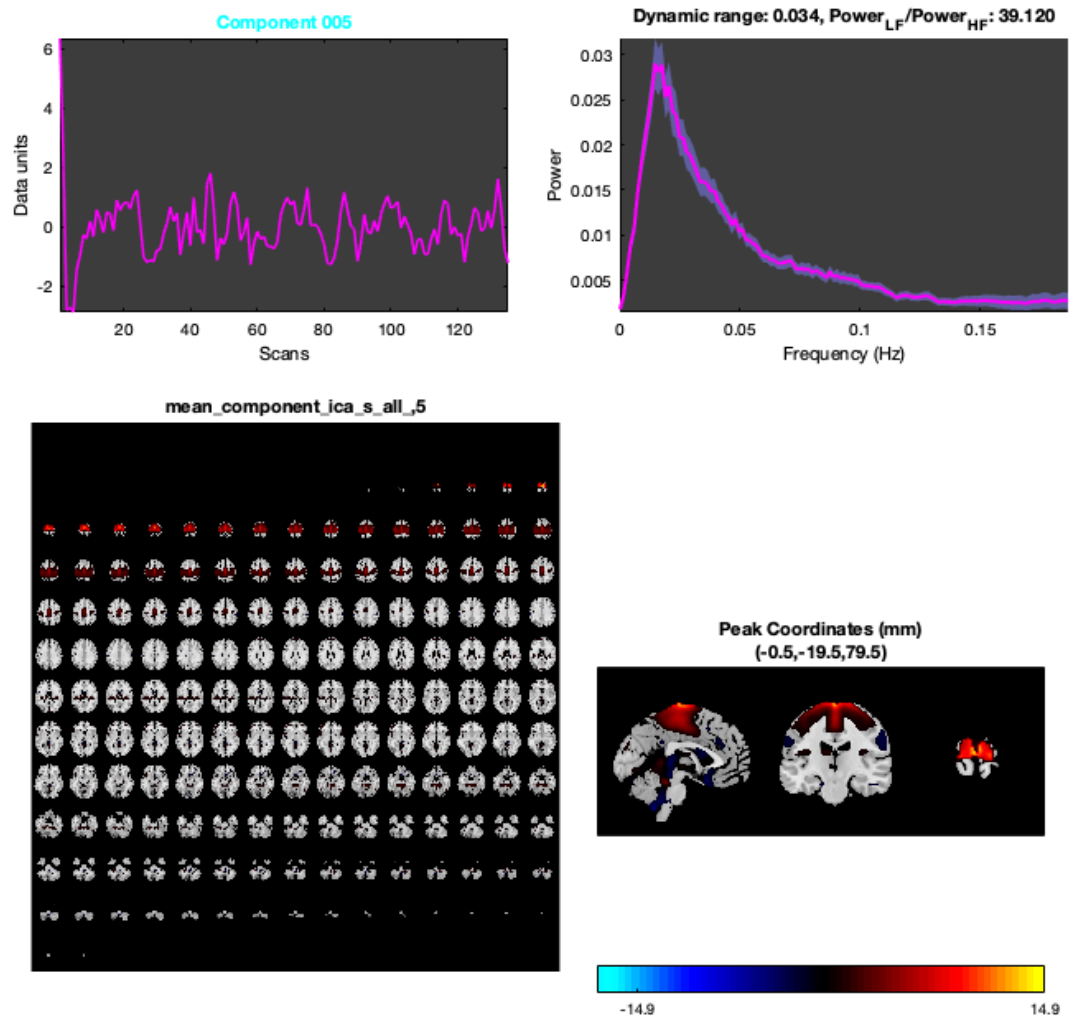

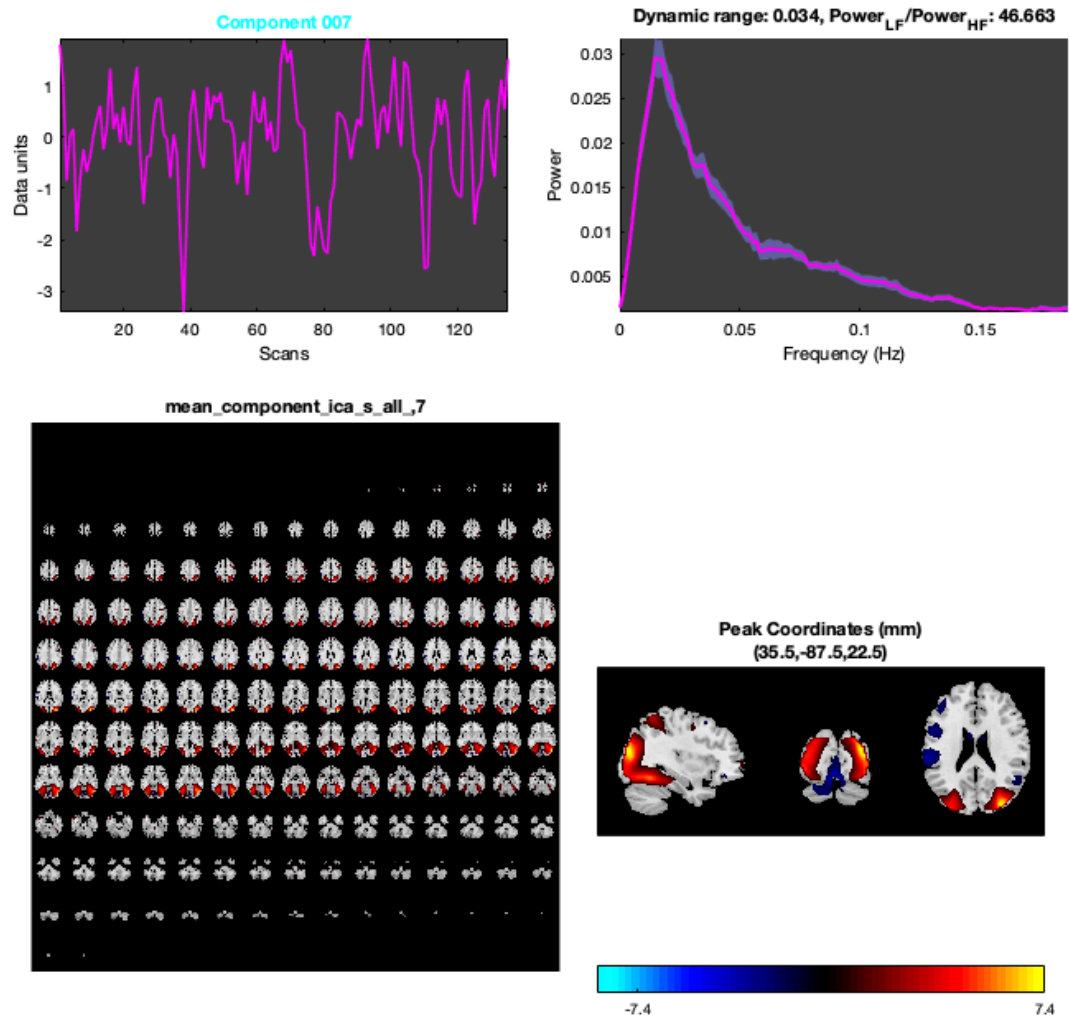

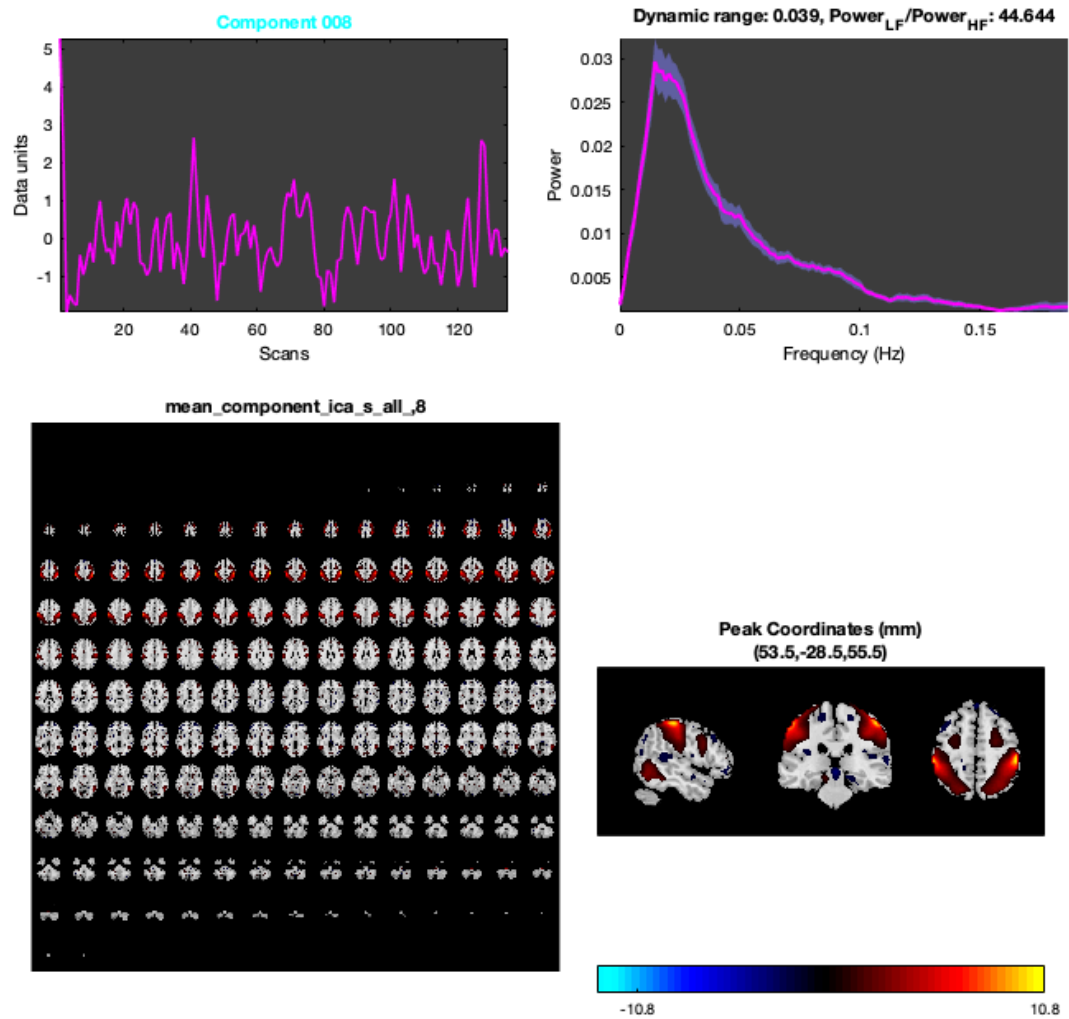

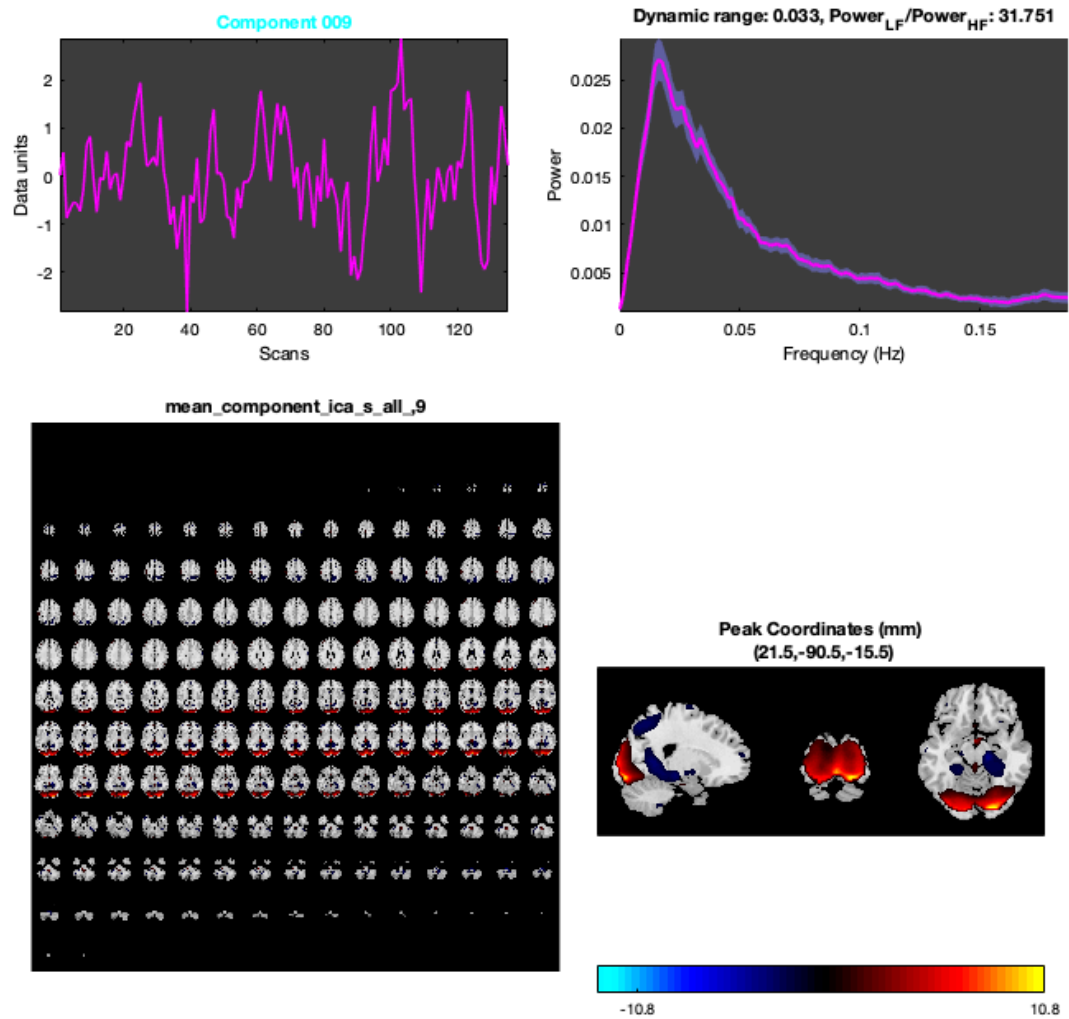

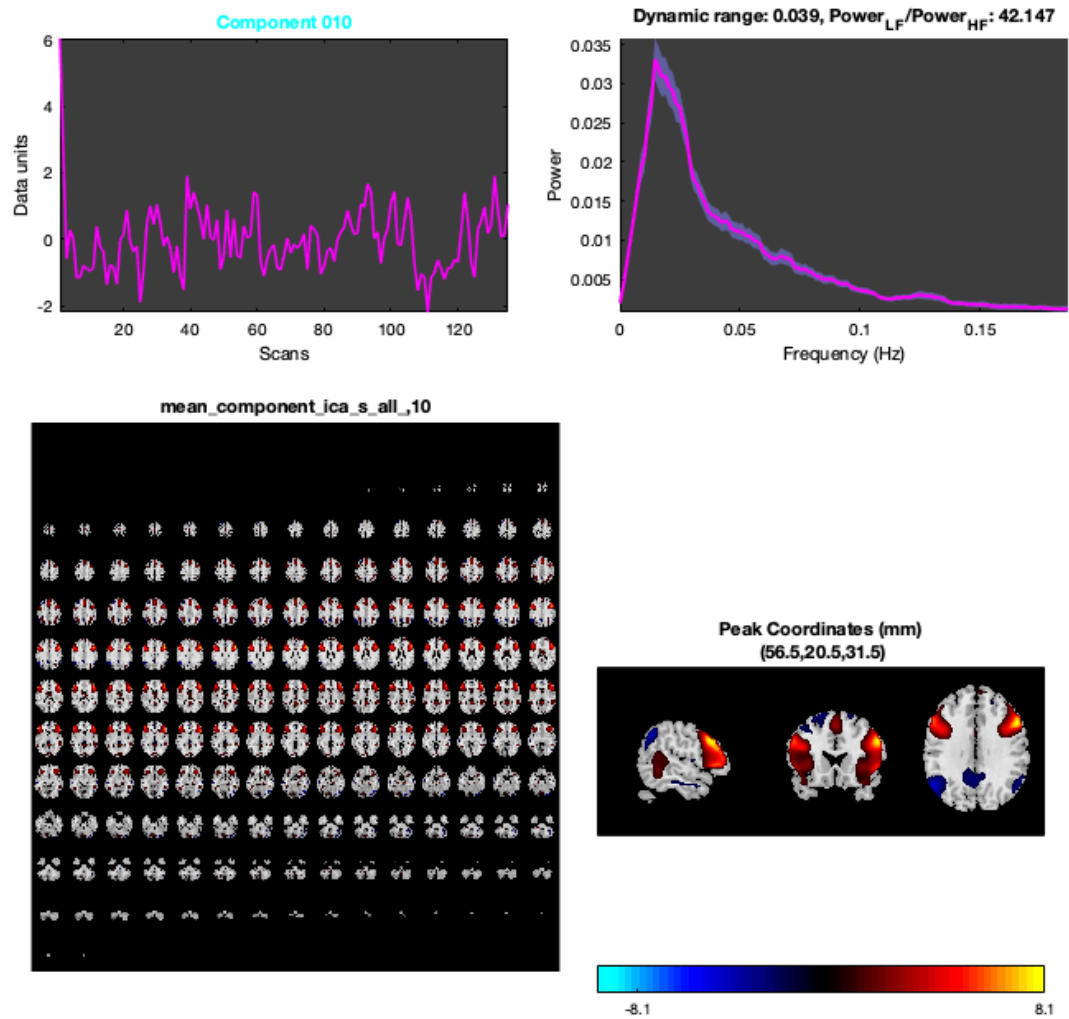



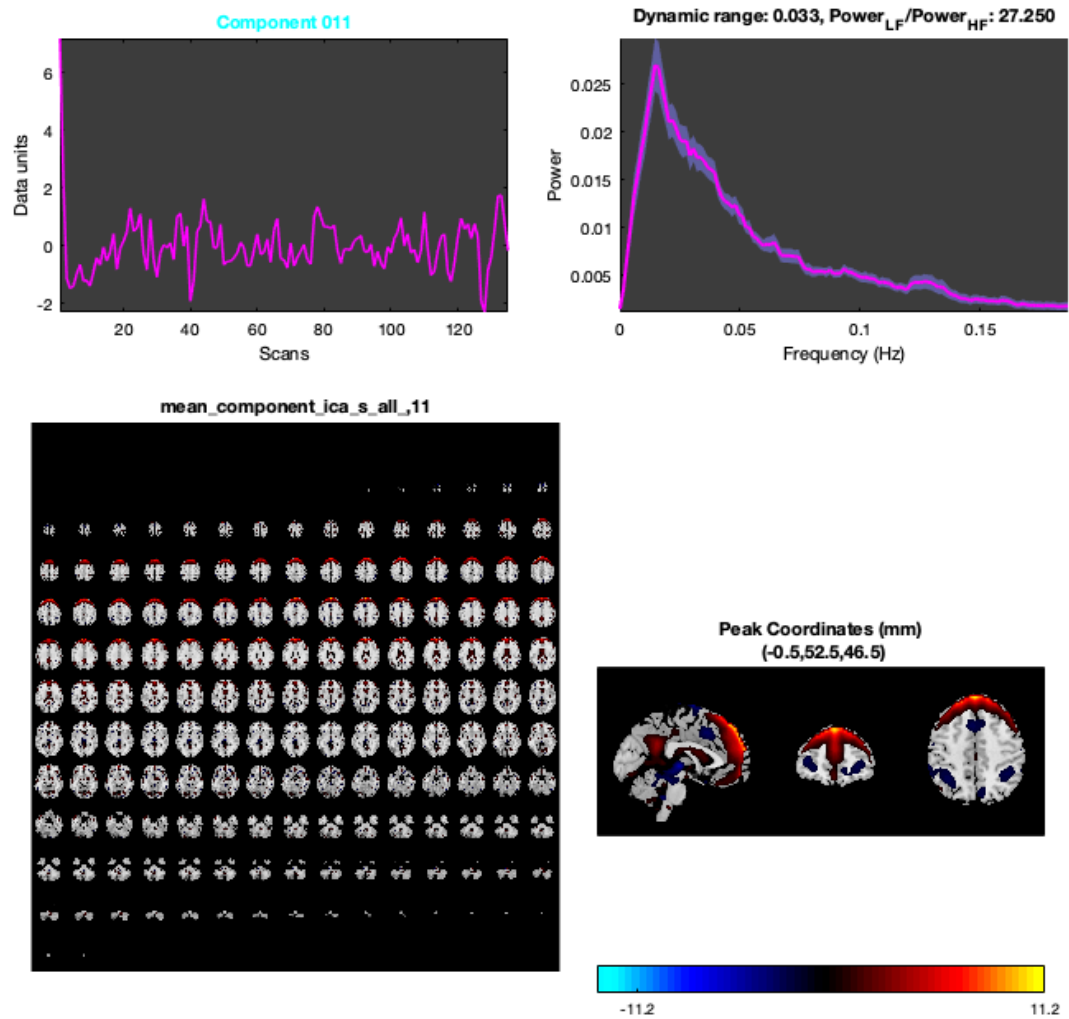

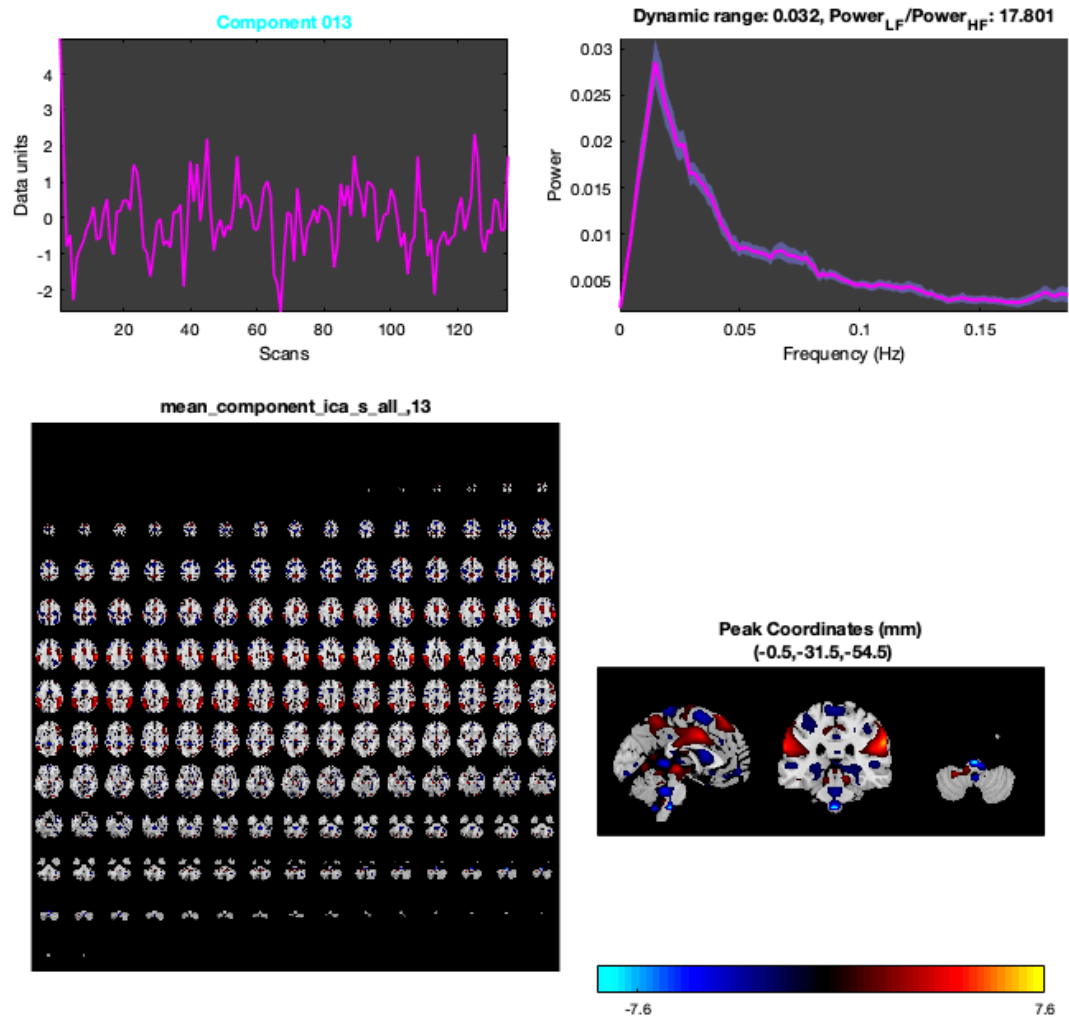

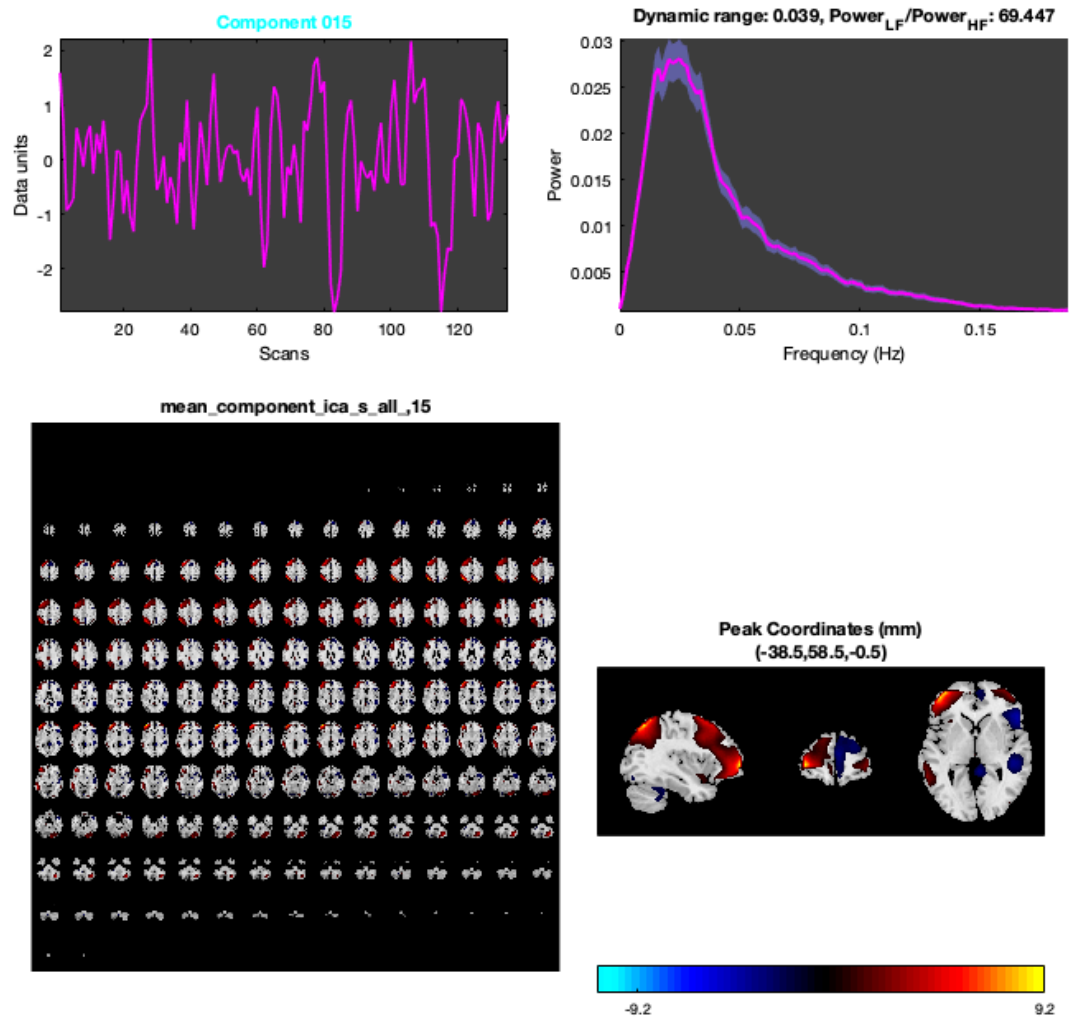

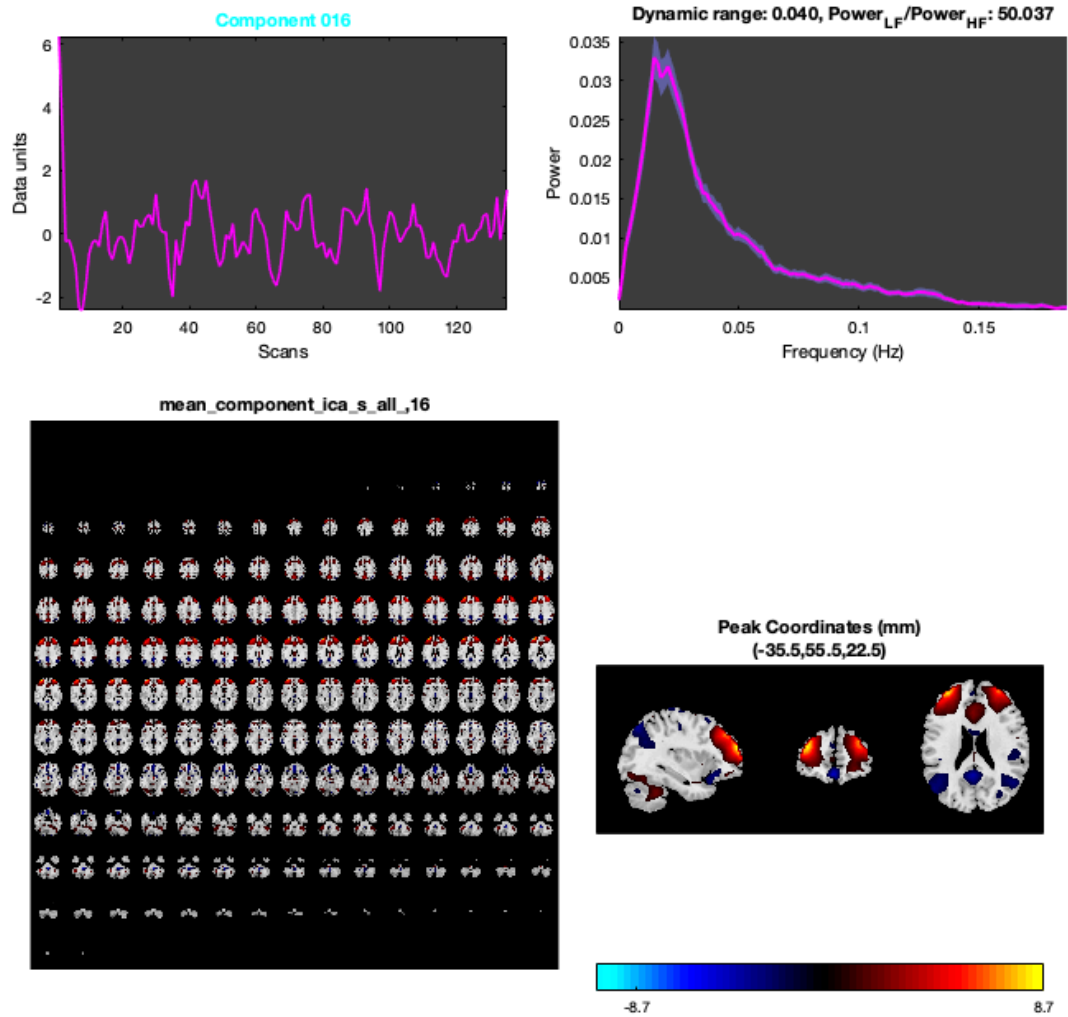

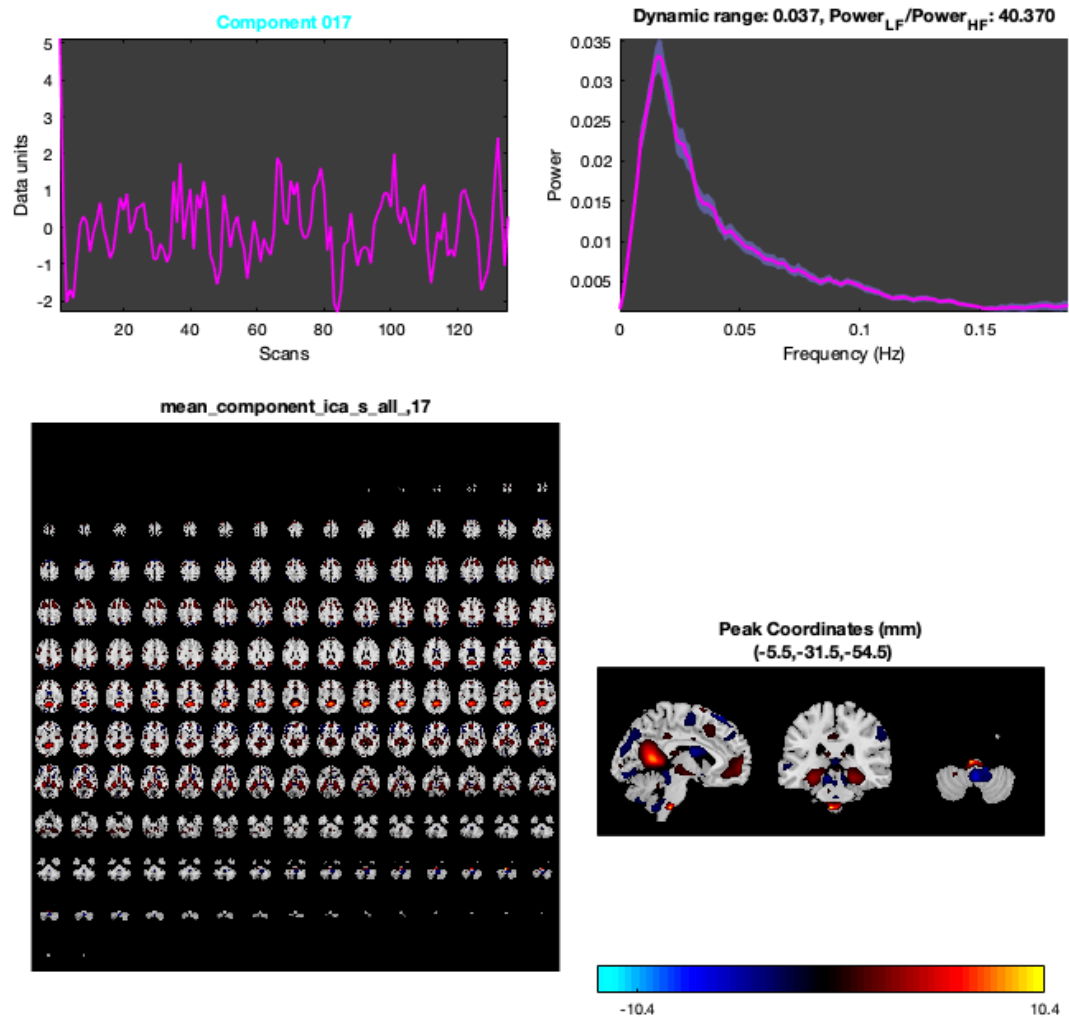

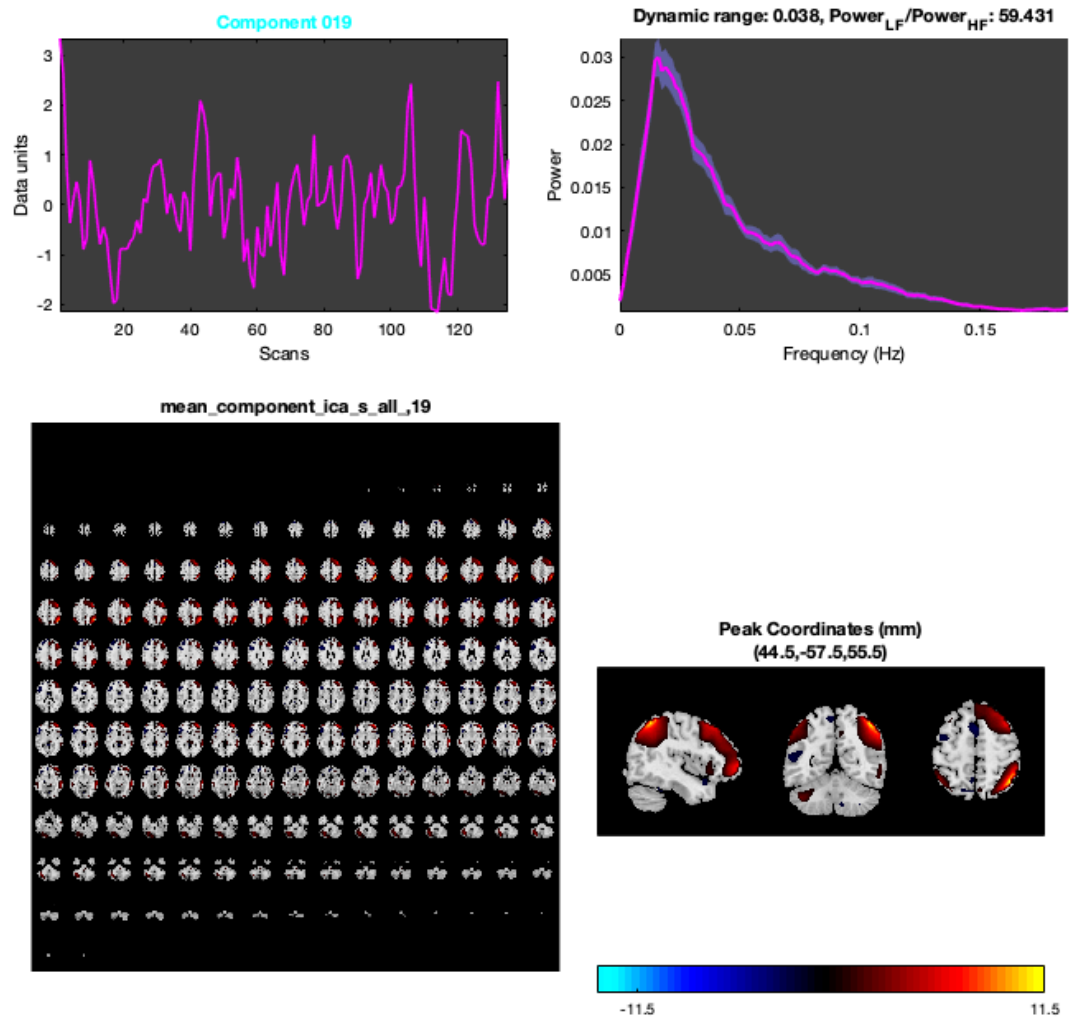

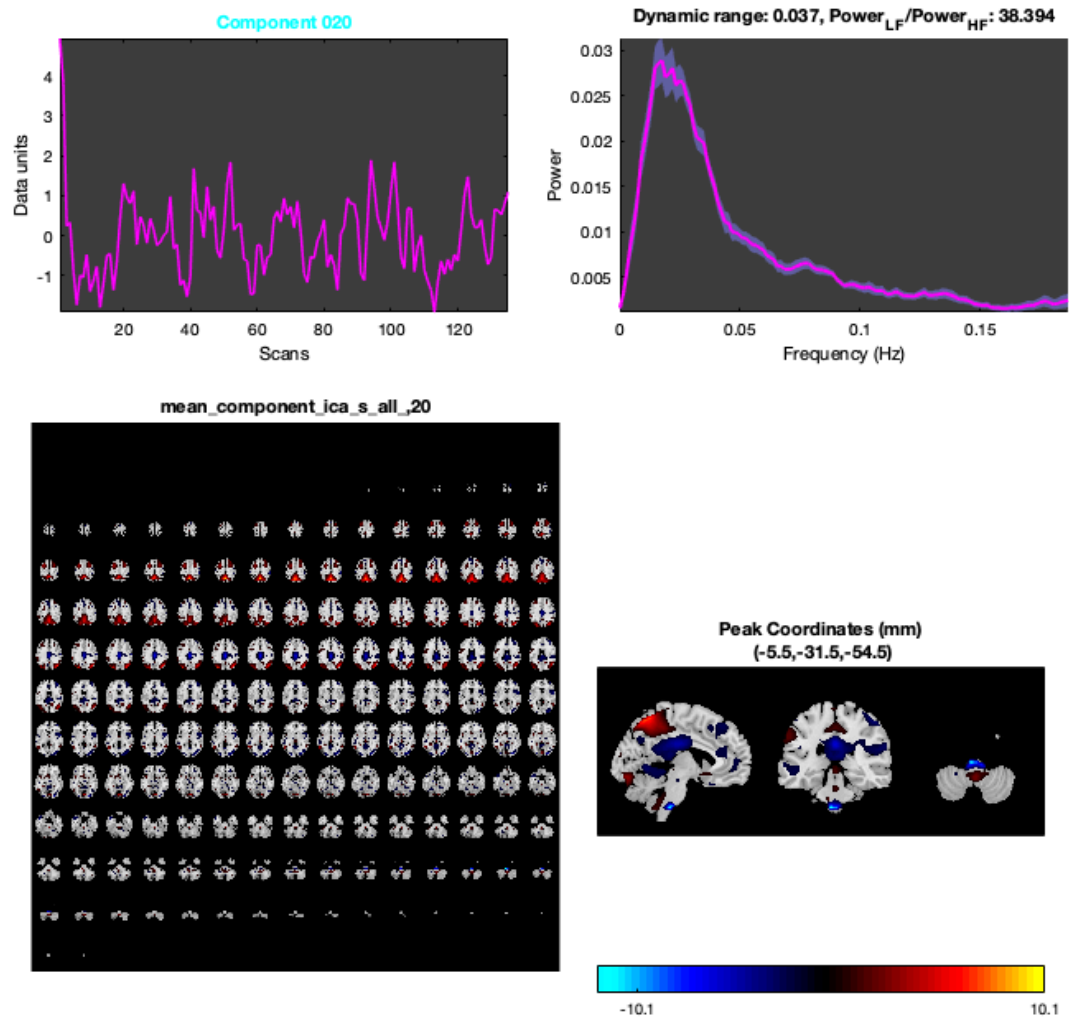

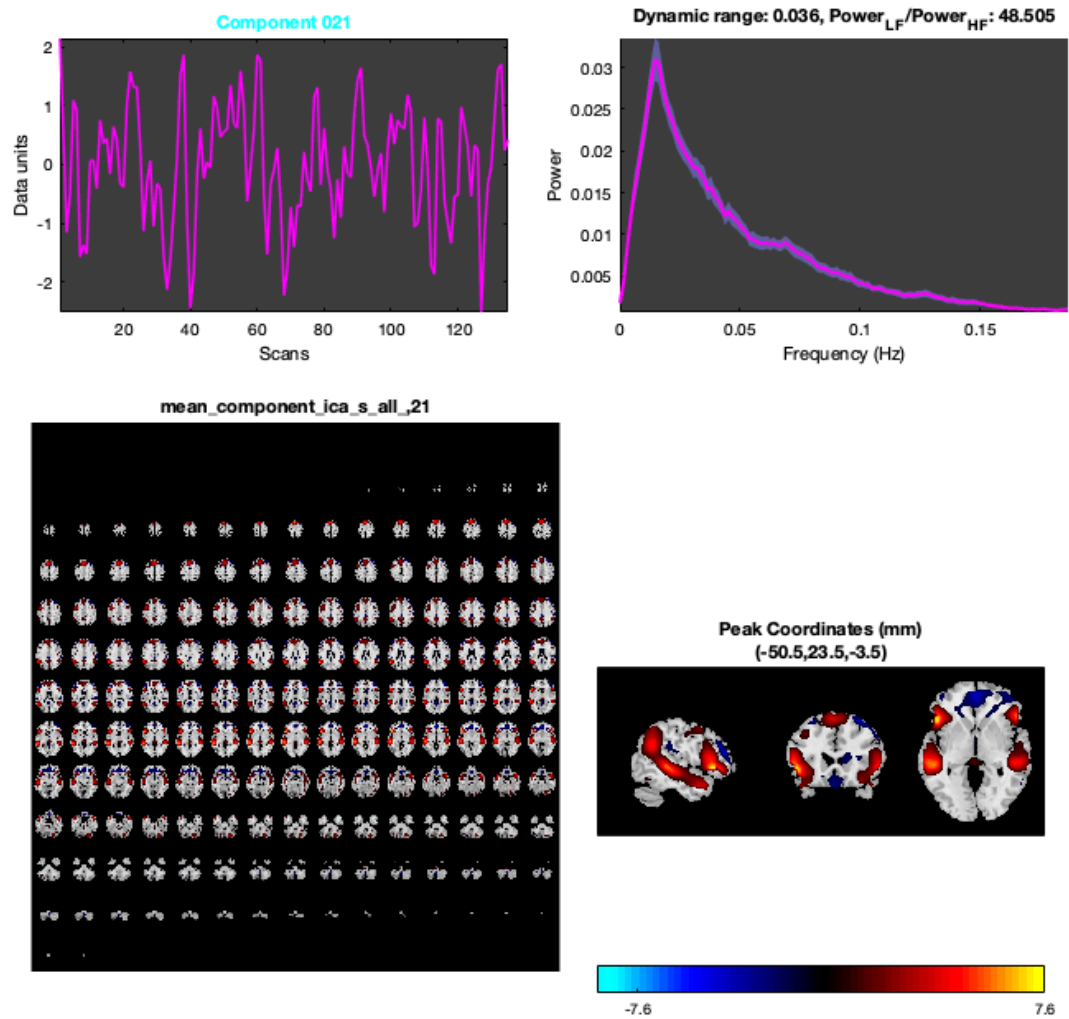



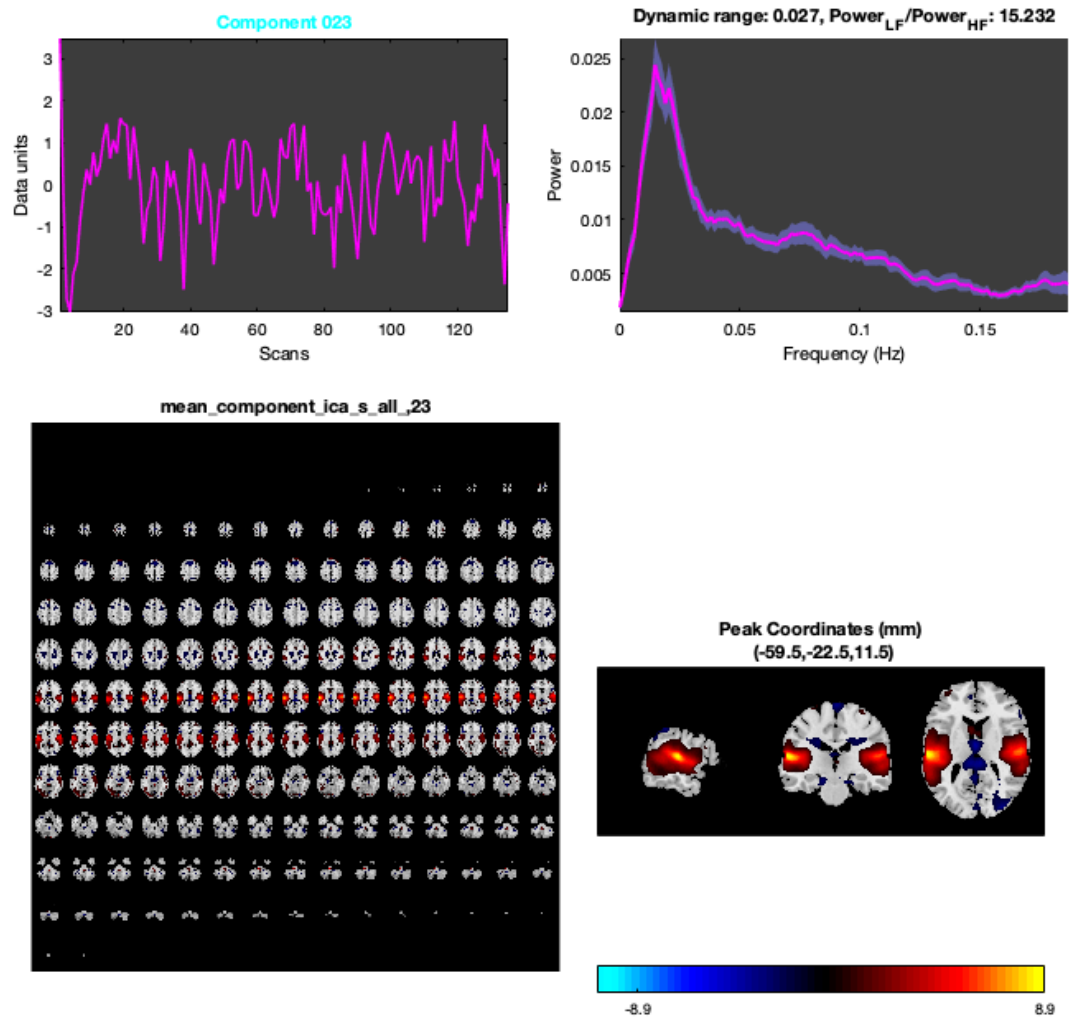

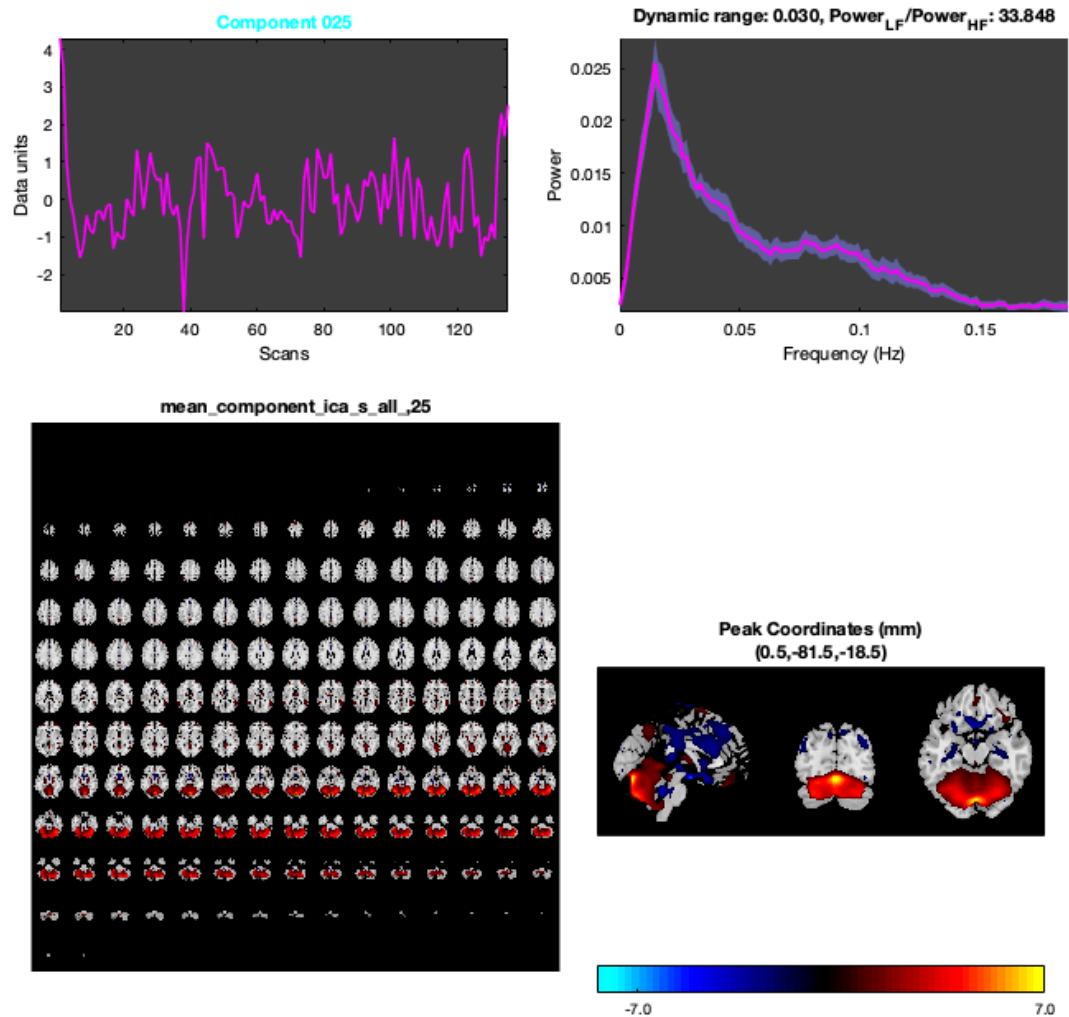

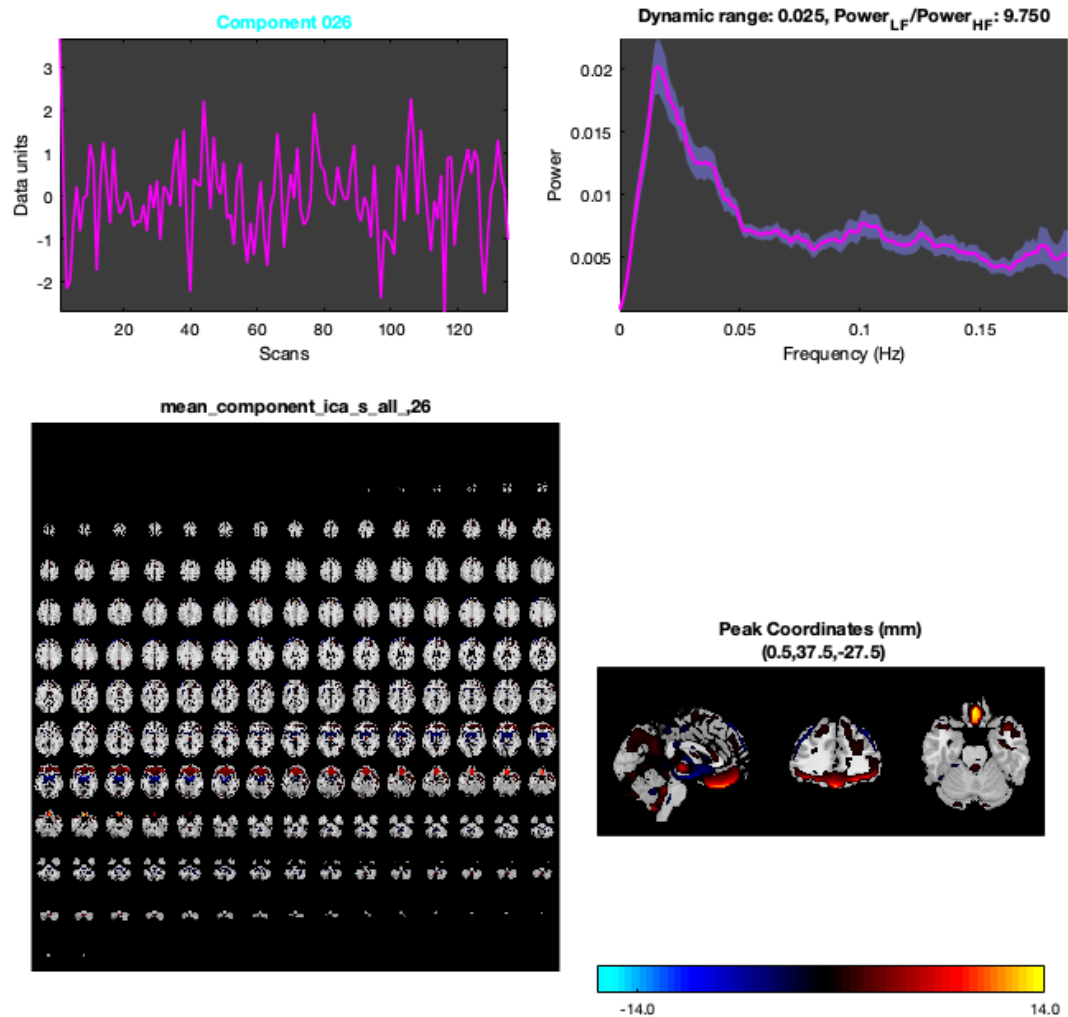

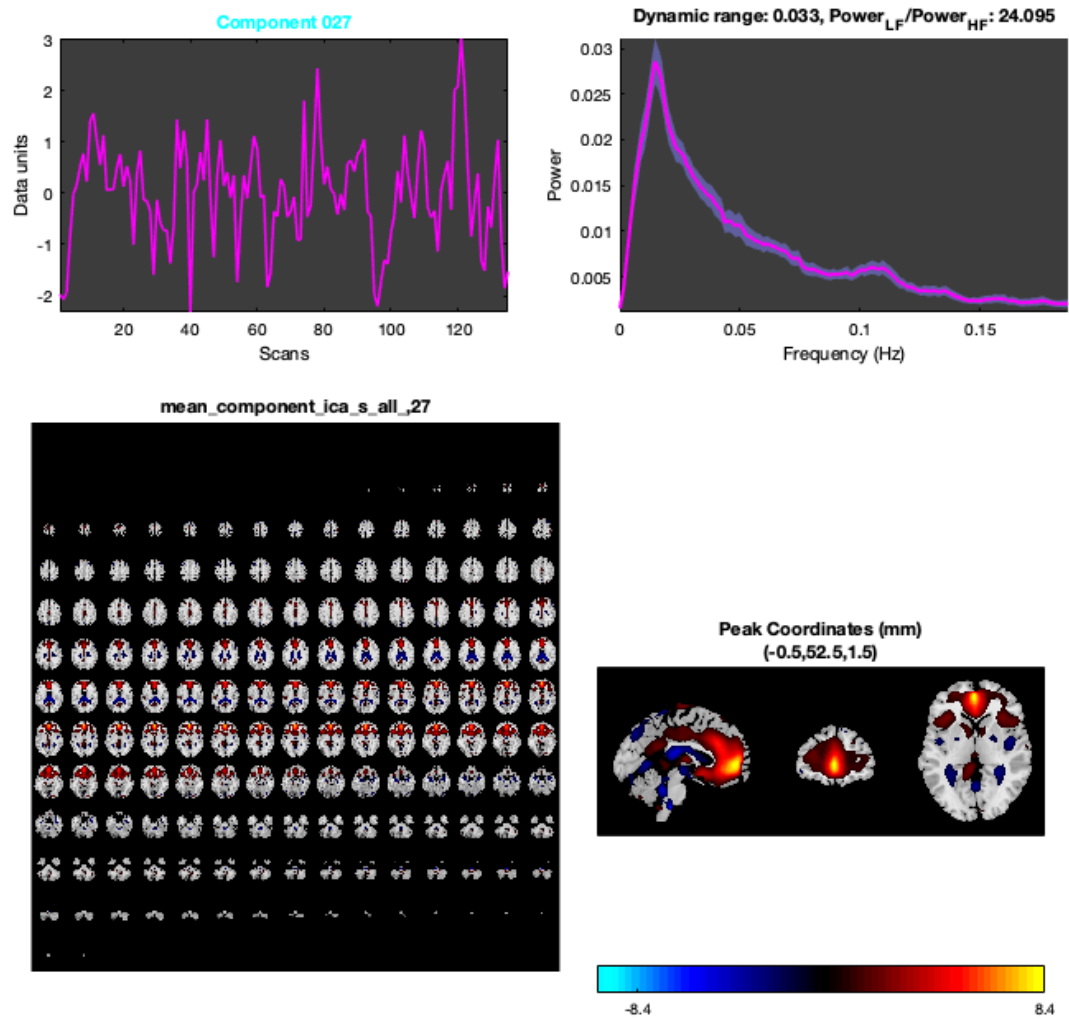

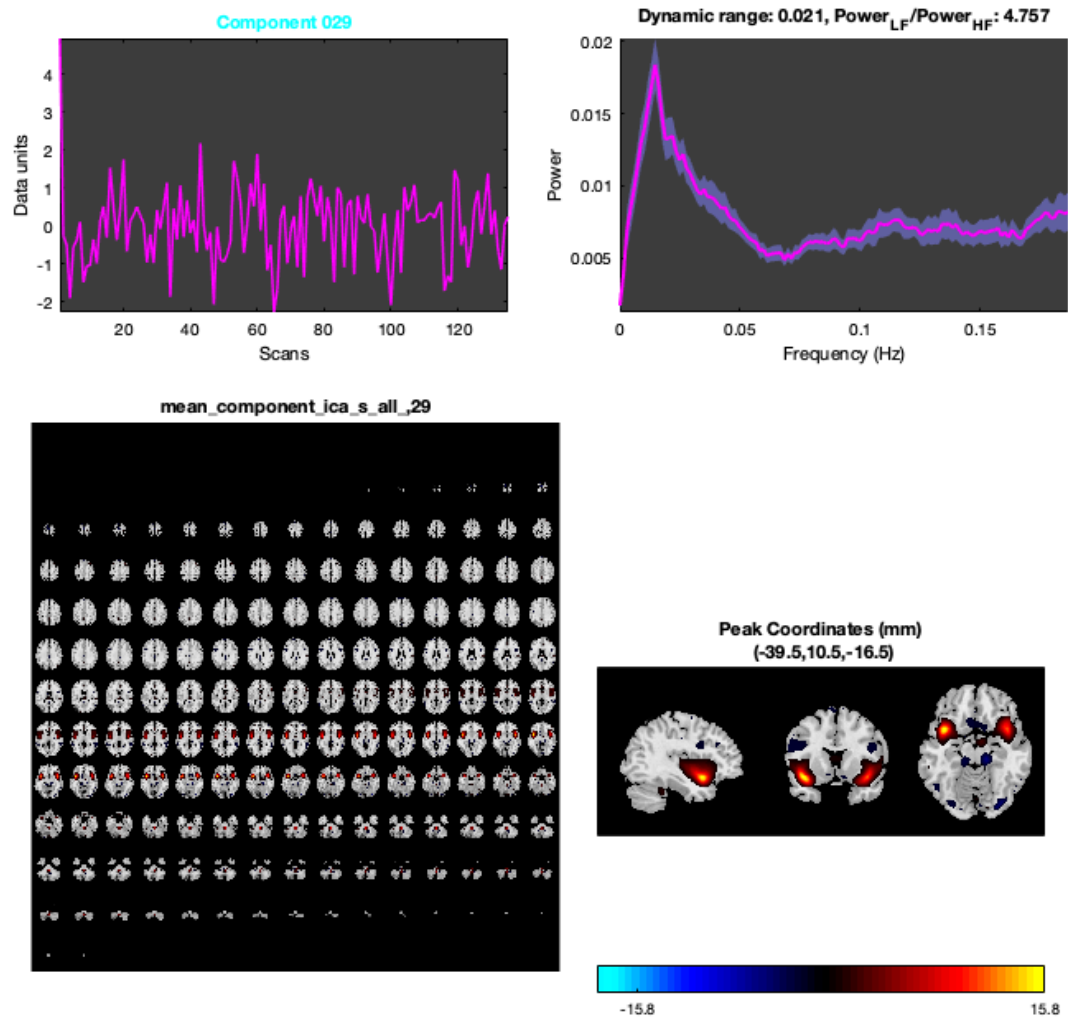

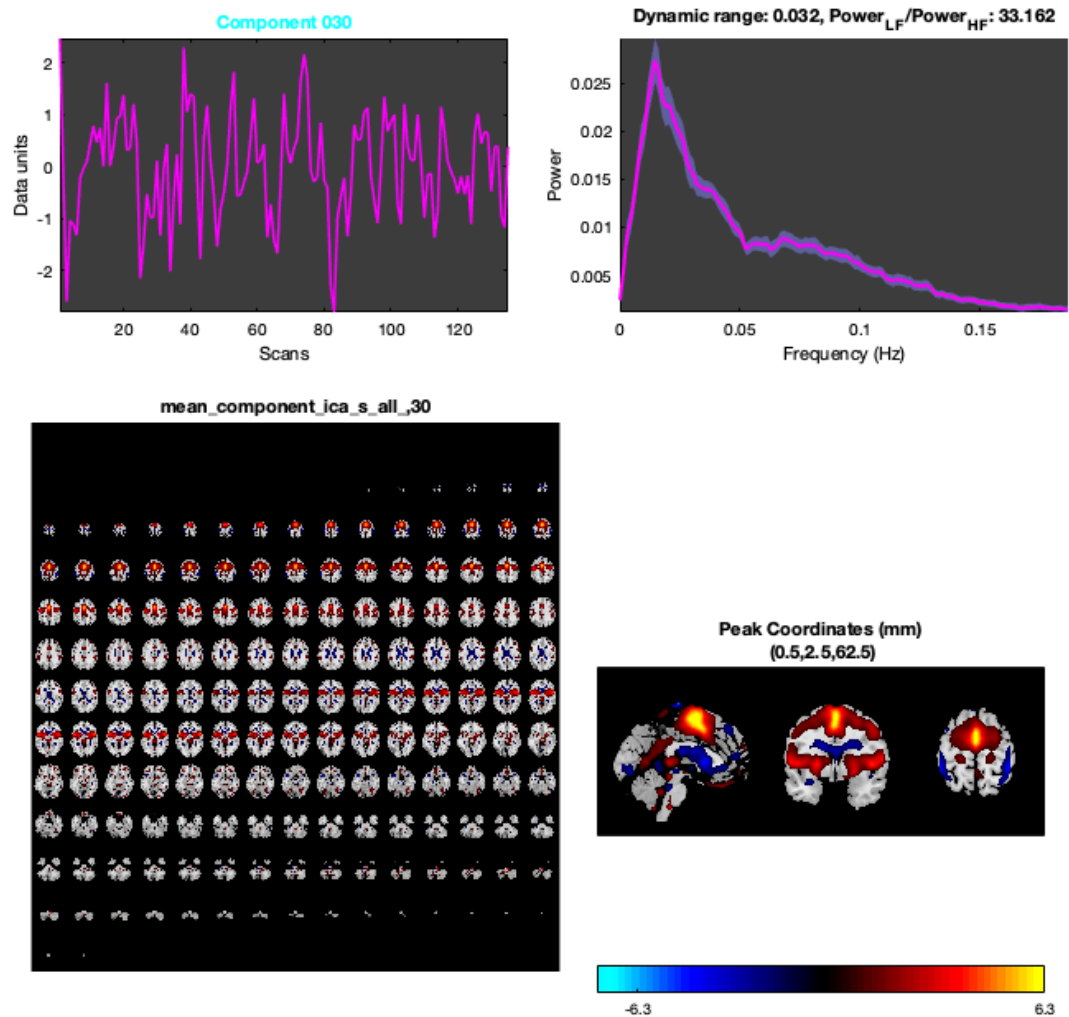

Supplement: Supplementary file [file 21820560]
